# Supplementary material
Source: Springer Nature journal article supplement (https://www.springermedizin.de/resource/supplementary/12935_2011_324_MOESM6_ESM.pdf/9540304)

**A**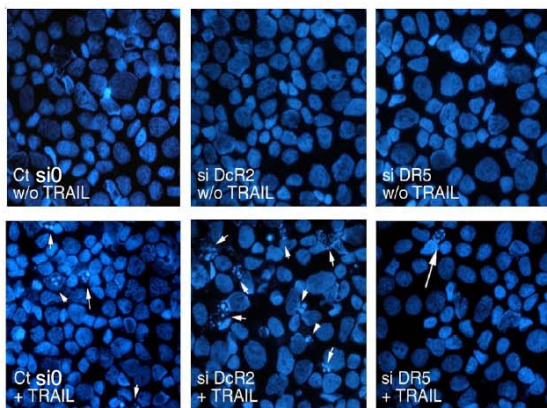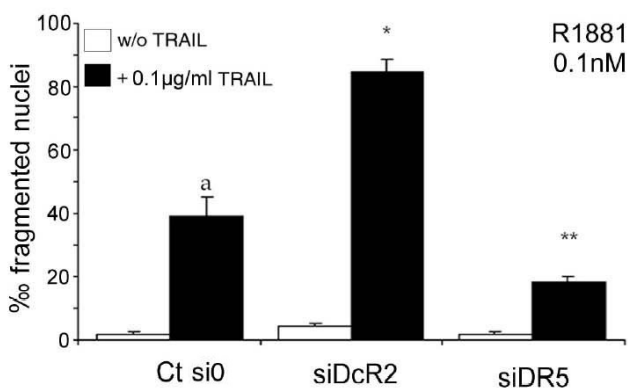**B**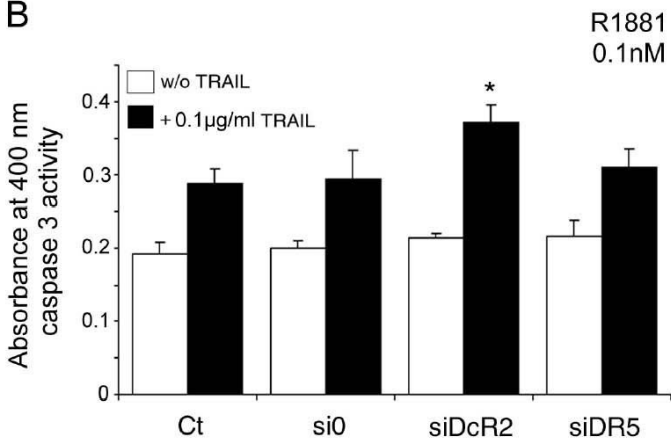

Supplement: MOESM6 [file 9540304]
